# Supplementary material for: GPCR-2L: predicting G protein-coupled receptors and their types by hybridizing two different modes of pseudo amino acid compositions
Source: Royal Society of Chemistry journal article supplement (doi:10.1039/c0mb00170h), 2010-12-23
Supplement: c0mb00170h-s3.pdf [file c0mb00170h-s3.pdf]

**Online Supporting Information S3.** List of the 63 functional domain names found from the 367 GPCR proteins in the  $S^{\text{GPCR}}$  dataset (cf. [Online Supporting Information S1](#)).

---

|                    |                     |                      |
|--------------------|---------------------|----------------------|
| BRLZ               | Pfam:7TM_GPCR_Srv   | Pfam:Laminin_G_1     |
| CA                 | Pfam:7TM_GPCR_Srw   | Pfam:Laminin_G_2     |
| Calx_beta          | Pfam:7TM_GPCR_Srx   | Pfam:Latrophilin     |
| CCP                | Pfam:ANF_receptor   | Pfam:Ldl_recept_a    |
| coiled_coil_region | Pfam:Bmp            | Pfam:LRRNT           |
| EGF_CA             | Pfam:bZIP_Maf       | Pfam:LRR_1           |
| EGF_Lam            | Pfam:Cadherin       | Pfam:Methuselah_N    |
| EGF_like           | Pfam:Calx-beta      | Pfam:NCD3G           |
| FRI                | Pfam:Dicty_CAR      | Pfam:OLF             |
| GPS                | Pfam:DUF1856        | Pfam:Orexin_rec2     |
| HormR              | Pfam:EGF            | Pfam:PAN_1           |
| KRAB               | Pfam:EGF_2          | Pfam:Rer1            |
| LamG               | Pfam:EGF_CA         | Pfam:Srg             |
| LDLa               | Pfam:Frizzled       | Pfam:STE2            |
| LRRNT              | Pfam:Fz             | Pfam:STE3            |
| LRR_TYP            | Pfam:Gal_Lectin     | Pfam:Sushi           |
| OLF                | Pfam:GluR_Homer-bdg | Pfam:TSP_1           |
| Pfam:7tm_1         | Pfam:GPS            | Pfam:XYPPX           |
| Pfam:7tm_2         | Pfam:HRM            | signal_peptide       |
| Pfam:7tm_3         | Pfam:KRAB           | transmembrane_domain |
| Pfam:7TM_GPCR_Srsx | Pfam:Laminin_EGF    | TSP1                 |
